# Supplementary material for: Unveiling the Molecular Basis of the Noonan Syndrome-Causing Mutation T42A of SHP2
Source: MDPI journal article supplement (doi:10.3390/ijms21020461), 2020-01-10
Supplement: s1 [file s1]

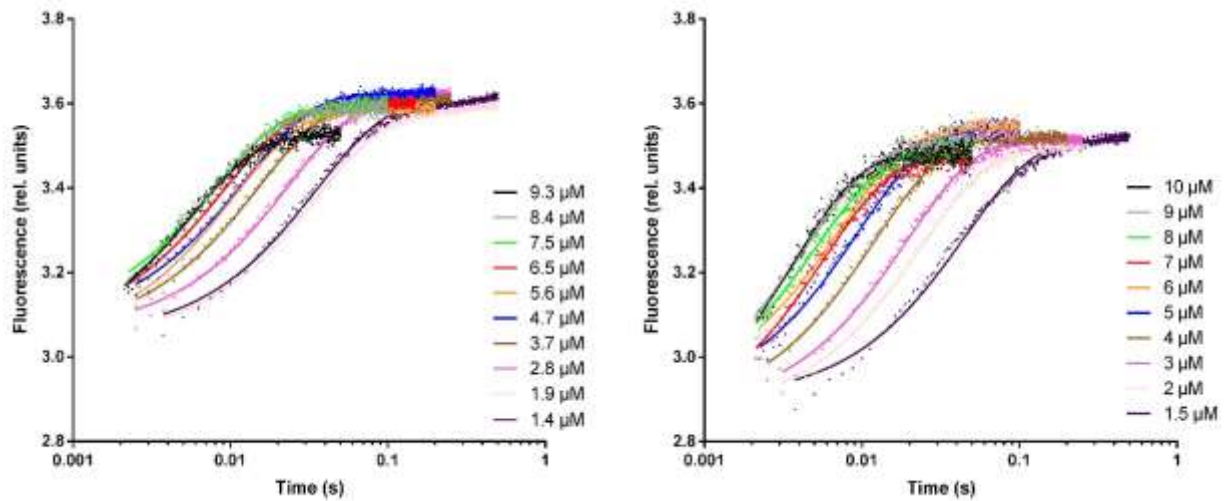

Figure S1. – Kinetic traces obtained by challenging a constant concentration Dansyl-Gab2<sub>608–620</sub> (1  $\mu\text{M}$ ) versus different concentrations of N-SH2 T42A (left panel) and N-SH2 T42S (right panel) in stopped-flow binding experiments. Experiments were conducted in buffer Tris-HCl 50 mM, pH 8.0, NaCl 300 mM, at 10 °C. Lines are the best fit to a single exponential equation.
